# Supplementary material
Source: PubMed Central journal article supplement (PMC5819360)

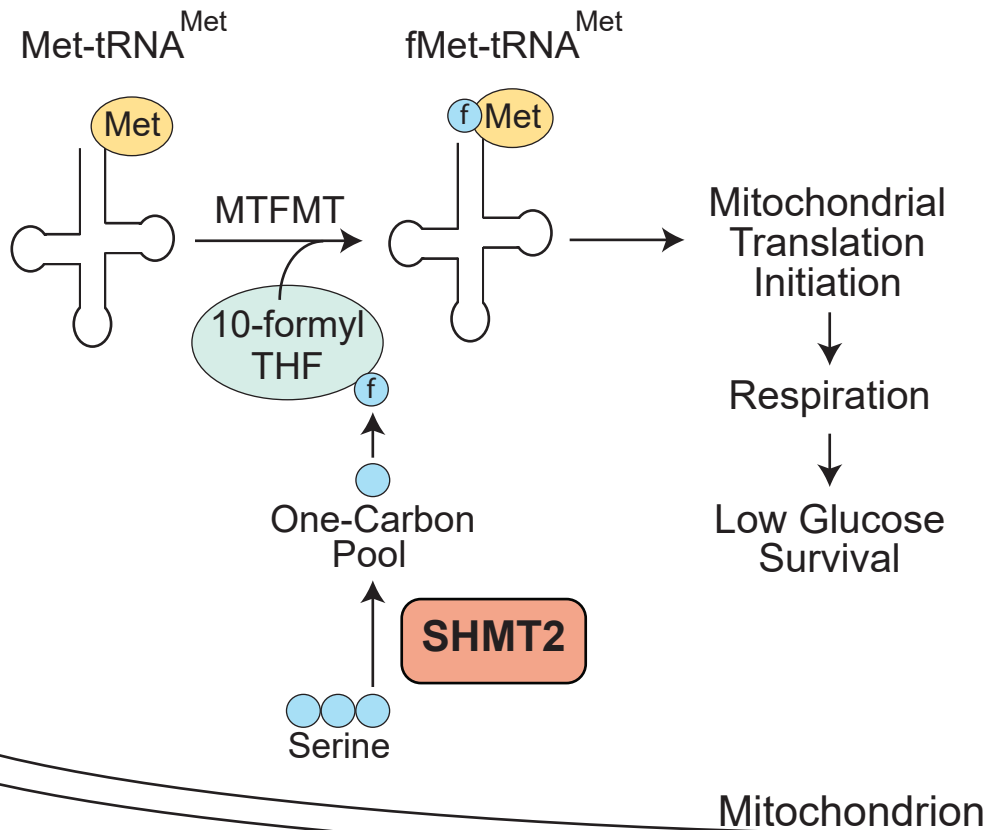

Supplement: NIHMS937023-supplement-1.pdf [file NIHMS937023-supplement-1.pdf]
